# Supplementary material
Source: Springer Nature journal article supplement (https://www.springermedizin.de/resource/supplementary/12936_2008_769_MOESM1_ESM.pdf/9548608)

Figure 1.

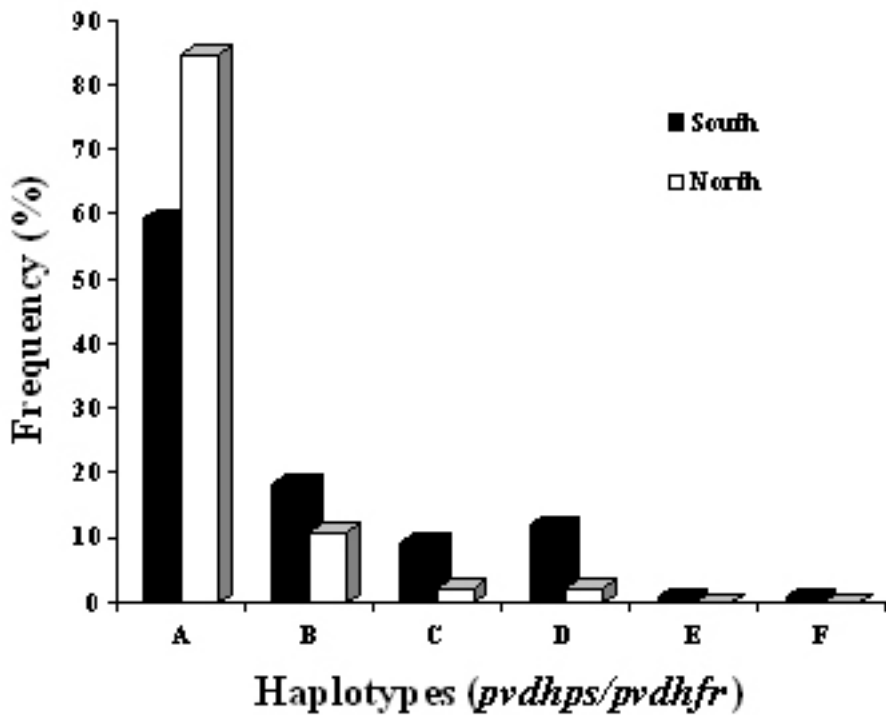

Supplement: MOESM1 [file 9548608]
